# Supplementary material
Source: MDPI journal article supplement (https://www.mdpi.com/2079-6412/10/6/576)
Supplement: s1 [file s1]

# Facile Route for Synthesis of Novel Flame Retardant, Reinforcement and Antibacterial Textile Fabrics Coatings

Nour F. Attia <sup>1,2,\*</sup>, Mohamed H. Soliman <sup>3</sup>, and Sahar S. El-Sakka <sup>3,\*</sup>

<sup>1</sup> Fire Protection Laboratory, Chemistry Division, National Institute of Standards, Giza 12211, Egypt

<sup>2</sup> Department of Energy Engineering, Gyeongnam National University of Science and Technology, Naedong-ro139beon-gil 8, Jinju 52849, Korea

<sup>3</sup> Chemistry Department, Faculty of Science, Suez University, Suez 43527, Egypt; Mohamed.Soliman@sci.suezuni.edu.eg

\* Correspondence: drnour2017@gntech.ac.kr (N.F.A.); Sahar.el-sakka@sci.suezuni.edu.eg (S.S.E.-S.)

Received: 31 May 2020; Accepted: 17 June 2020; Published: date

## Supplementary Materials

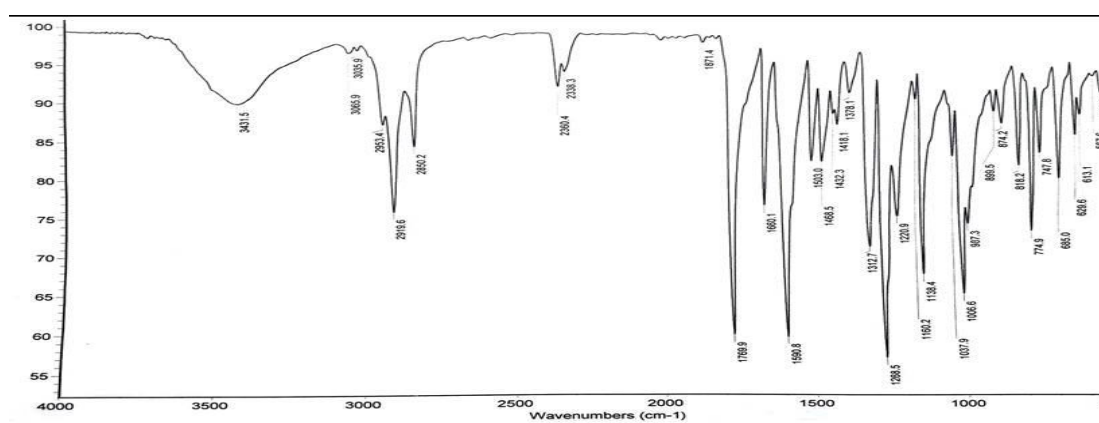

(a)

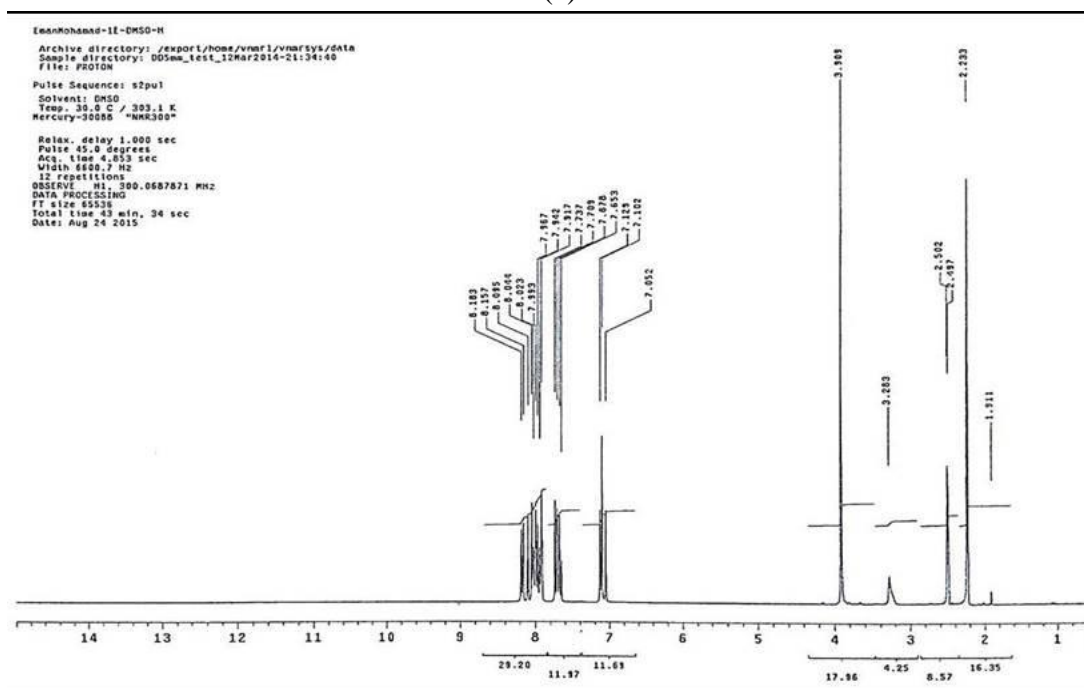

(b)

**Figure S1.** FTIR spectrum (a) and  $^1\text{H}$  NMR (300 MHz, DMSO) spectrum (b) of 2-[3-(4-Methoxy-3-methylphenyl)-3-oxoprop-1-enyl]-4H-3,1-benzoxazin-4-one (2).

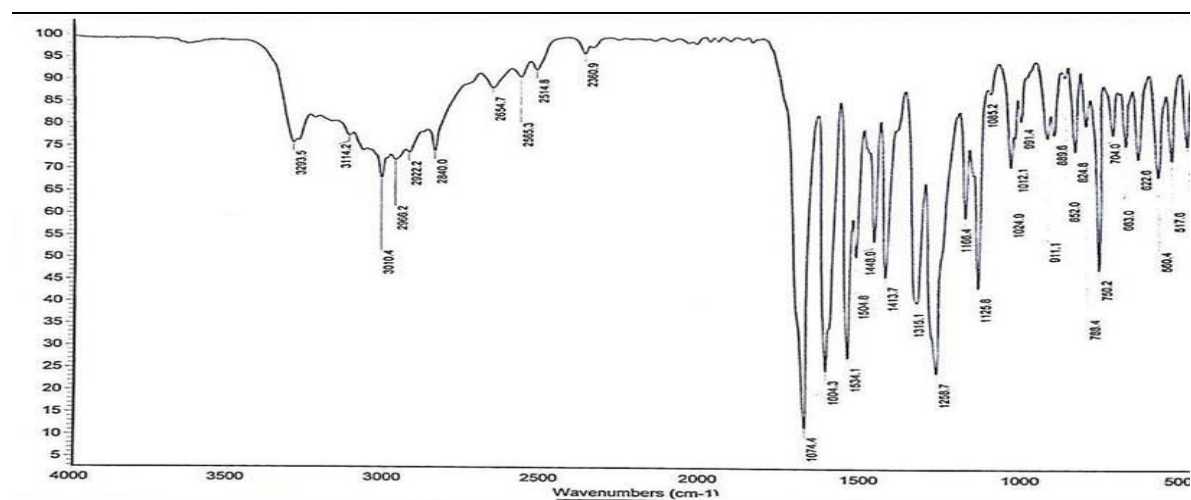

(a)

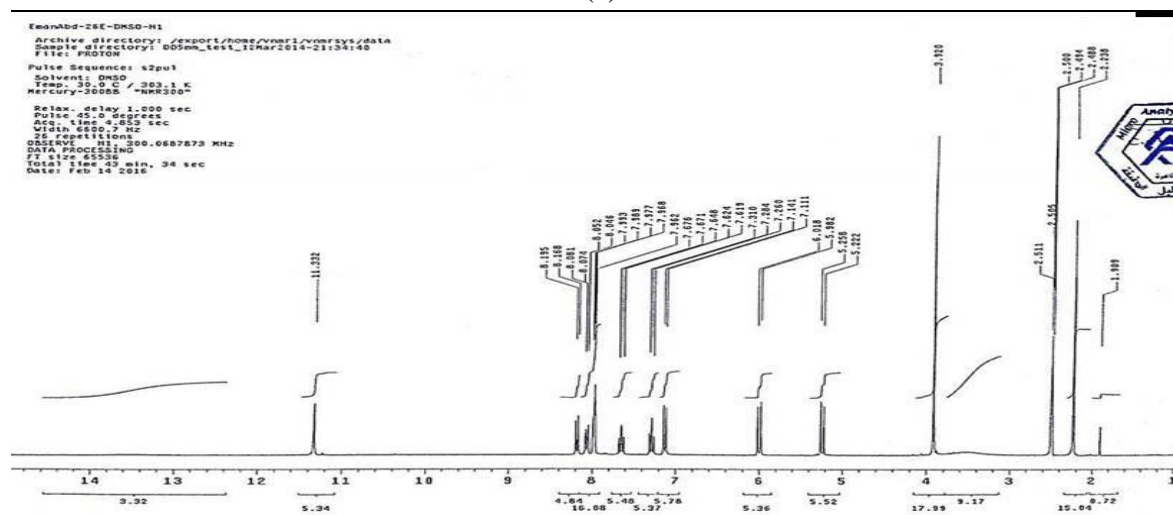

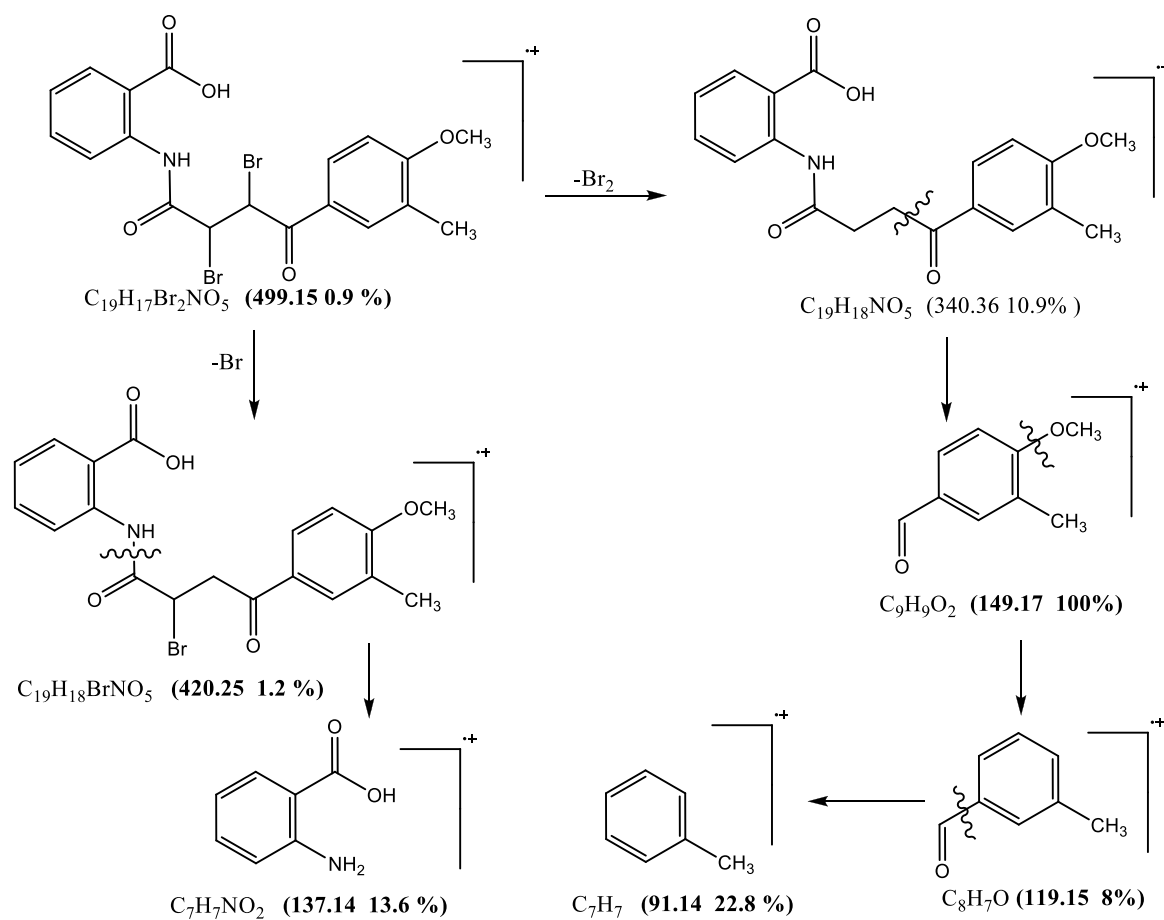

Figure S3. Suggested fragmentation pattern of compound (OA).
